# Supplementary material for: Hydrothermal synthesis of graphene/Fe3+-doped TiO2 nanowire composites with highly enhanced photocatalytic activity under visible light irradiation
Source: Royal Society of Chemistry journal article supplement (doi:10.1039/c5ta00763a), 2015-01-01
Supplement: c5ta00763a1.pdf [file c5ta00763a1.pdf]

# Hydrothermal Synthesis of Graphene/Fe<sup>3+</sup>-Doped TiO<sub>2</sub> Nanowire Composites with Highly Enhanced Photocatalytic Activity under Visible Light Irradiation

Wenqiang Li,<sup>a</sup> Xiang Liu<sup>\*a</sup> and Hexing Li<sup>\*b</sup>

<sup>a</sup> The Laboratory of Food Colloids and Biotechnology, Ministry of Education, School of Chemical and Material Engineering, Jiangnan University, Wuxi 214122, China. E-mail: liuxiang@jiangnan.edu.cn

<sup>b</sup> The Key Laboratory of the Chinese Ministry of Education in Resource Chemistry, Shanghai Normal University, Shanghai 200234, China. E-mail: hexing-li@shnu.edu.cn

## Supplementary information

### Content

|           |    |
|-----------|----|
| Figure S1 | S2 |
| Figure S2 | S2 |
| Figure S3 | S3 |

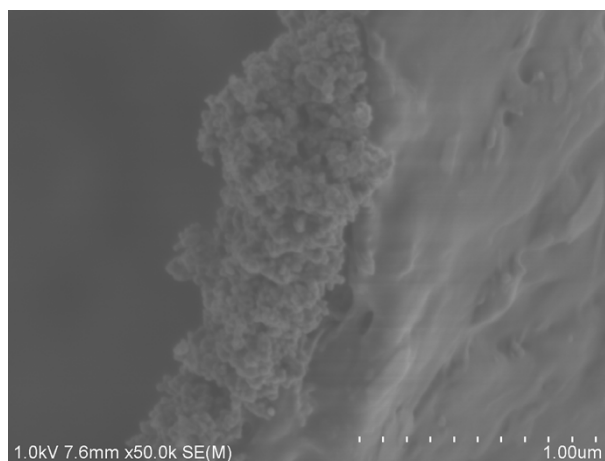

**Figure S1.** SEM of the GR/NPCs.

---

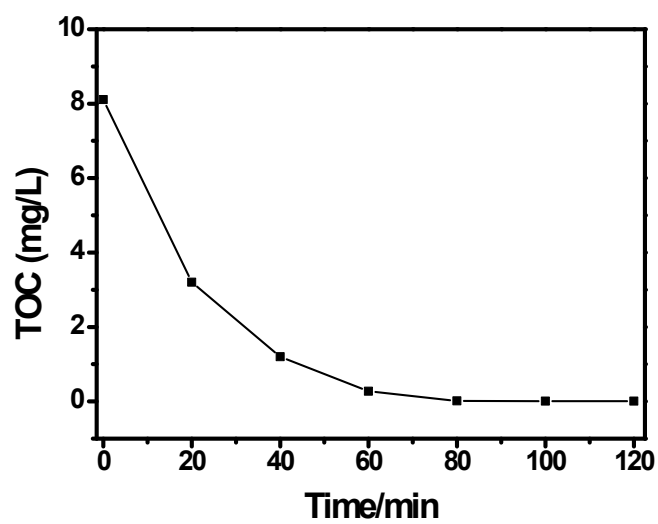

**Figure S2.** The TOC removal curve of MB photocatalytic degradation by GR/Fe-NWCs.

---

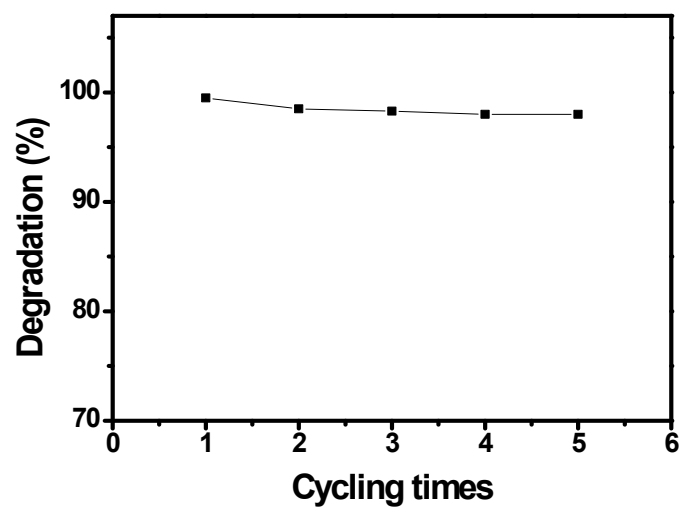

**Figure S3.** The cycling degradation efficiency of GR/Fe-NWCs toward MB under visible light irradiation.

---
